# Supplementary material for: Rapid and Specific Detection of Apple stem grooving virus by Reverse Transcription-recombinase Polymerase Amplification
Source: PubMed Central journal article supplement — Plant Pathol J. 2018 Dec 1;34(6):575–9. doi: 10.5423/PPJ.NT.06.2018.0108 (PMC6305176; doi:10.5423/ppj.nt.06.2018.0108), 2018-12-01
Supplement: ppj-34-575_suppl.pdf [file ppj-34-575_suppl.pdf]

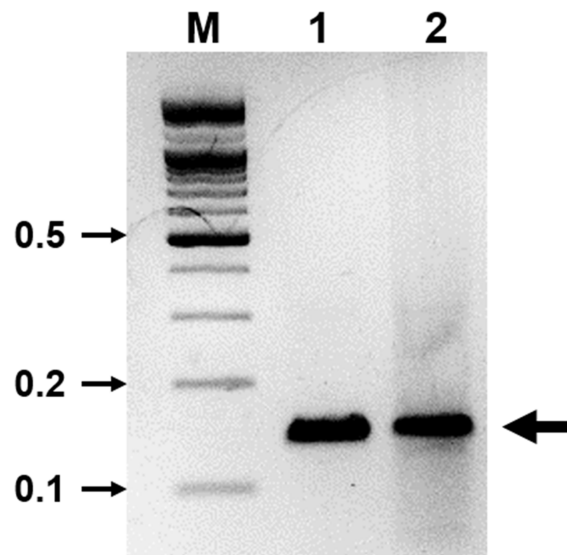

**Supplementary Fig. 1.** Detection of ASGV from pear fruits and pear tree seedlings with RT-RPA. RNAs from the ASGV-infected pear fruits and pear tree seedlings were amplified with RT-RPA. M, DNA marker; lane 1, ASGV-infected pear fruits; lane 2, ASGV-infected tree seedlings. Five independent reactions were performed, and similar results were obtained.
